# Supplementary material for: Personalized oncogenomic analysis of metastatic adenoid cystic carcinoma: using whole-genome sequencing to inform clinical decision-making
Source: PubMed Central journal article supplement — Cold Spring Harb Mol Case Stud. 2018 Apr;4(2):a002626. doi: 10.1101/mcs.a002626 (PMC5880267; doi:10.1101/mcs.a002626), 2018-04

A.

| Signature    | POG   |       |       |       |       | Probable Associations | Additional Features | #  | Cancer types                                                                                            | Significant Cancer Type |
|--------------|-------|-------|-------|-------|-------|-----------------------|---------------------|----|---------------------------------------------------------------------------------------------------------|-------------------------|
|              | NNLS  | NNLS  | NNLS  | NNLS  | NNLS  |                       |                     |    |                                                                                                         |                         |
| Signature 1  | 0.168 | 0.298 | 0.211 | 0.318 | 0.154 | Age                   | I                   | 40 | all                                                                                                     |                         |
| Signature 2  | 0.008 | 0.006 | 0.000 | 0.000 | 0.018 | APOBEC                | -                   | 22 | cervical cancer, urinary bladder cancer                                                                 |                         |
| Signature 3  | 0.168 | 0.000 | 0.018 | 0.000 | 0.168 | BRCA1/2 mutations     | I                   | 3  | breast cancer, ovarian cancer, pancreatic cancer                                                        |                         |
| Signature 4  | 0.000 | 0.000 | 0.000 | 0.000 | 0.000 | Smoking               | D,T                 | 6  | head and neck cancer, liver cancer, lung cancer, esophageal cancer                                      |                         |
| Signature 5  | 0.161 | 0.304 | 0.264 | 0.041 | 0.380 | -                     | -                   | 40 | all                                                                                                     |                         |
| Signature 6  | 0.000 | 0.000 | 0.000 | 0.000 | 0.001 | DNA MMR deficiency    | I                   | 17 | colorectal cancer, uterine cancer                                                                       |                         |
| Signature 7  | 0.000 | 0.000 | 0.000 | 0.000 | 0.000 | UV light              | D,T                 | 2  | skin cancer, oral squamous cell carcinoma                                                               |                         |
| Signature 8  | 0.102 | 0.104 | 0.159 | 0.135 | 0.000 | -                     | -                   | 2  | breast cancer, medulloblastoma                                                                          |                         |
| Signature 9  | 0.005 | 0.038 | 0.021 | 0.038 | 0.009 | IG gene hypermutation | -                   | 2  | chronic lymphocytic leukemia, diffuse large B-cell lymphoma                                             |                         |
| Signature 10 | 0.016 | 0.000 | 0.007 | 0.005 | 0.000 | Pol e mutations       | T                   | 6  | colorectal cancer, uterine cancer                                                                       |                         |
| Signature 11 | 0.033 | 0.017 | 0.000 | 0.000 | 0.000 | Temozolomide          | -                   | 2  | melanoma, glioblastoma                                                                                  |                         |
| Signature 12 | 0.000 | 0.000 | 0.000 | 0.000 | 0.159 | -                     | -                   | 1  | liver cancer                                                                                            |                         |
| Signature 13 | 0.013 | 0.008 | 0.005 | 0.011 | 0.008 | APOBEC                | -                   | 22 | cervical cancer, urinary bladder cancer                                                                 |                         |
| Signature 14 | 0.000 | 0.000 | 0.000 | 0.000 | 0.000 | -                     | -                   | 2  | uterine cancer, brain glioma                                                                            |                         |
| Signature 15 | 0.000 | 0.000 | 0.000 | 0.000 | 0.000 | DNA MMR deficiency    | I                   | 2  | stomach cancer, lung cancer                                                                             |                         |
| Signature 16 | 0.228 | 0.216 | 0.209 | 0.365 | 0.010 | -                     | -                   | 1  | liver cancer                                                                                            |                         |
| Signature 17 | 0.000 | 0.000 | 0.000 | 0.000 | 0.000 | -                     | -                   | 7  | esophageal cancer, breast cancer, liver cancer, lung adenocarcinoma, B-cell lymphoma, stomach cancer, r |                         |
| Signature 18 | 0.000 | 0.000 | 0.000 | 0.000 | 0.000 | -                     | -                   | 3  | neuroblastoma, breast cancer, stomach cancer                                                            |                         |
| Signature 19 | 0.000 | 0.000 | 0.000 | 0.000 | 0.000 | -                     | -                   | 1  | pilocytic astrocytoma                                                                                   |                         |
| Signature 20 | 0.000 | 0.000 | 0.000 | 0.000 | 0.049 | DNA MMR deficiency    | I                   | 2  | stomach cancer, breast cancer                                                                           |                         |
| Signature 21 | 0.000 | 0.000 | 0.000 | 0.000 | 0.000 | -                     | -                   | 1  | stomach cancer                                                                                          |                         |
| Signature 22 | 0.000 | 0.000 | 0.000 | 0.000 | 0.004 | aristolochic acid     | -                   | 2  | urinary bladder cancer, liver cancer                                                                    |                         |
| Signature 23 | 0.000 | 0.000 | 0.000 | 0.000 | 0.000 | -                     | -                   | 1  | liver cancer                                                                                            |                         |
| Signature 24 | 0.000 | 0.000 | 0.000 | 0.000 | 0.000 | aflatoxin             | -                   | 1  | liver cancer                                                                                            |                         |
| Signature 25 | 0.000 | 0.000 | 0.000 | 0.000 | 0.000 | -                     | -                   | 1  | Hodgkin's lymphoma cell lines                                                                           |                         |
| Signature 26 | 0.000 | 0.000 | 0.000 | 0.000 | 0.000 | DNA MMR deficiency    | I                   | 4  | breast cancer, cervical cancer, stomach cancer, uterine cancer                                          |                         |
| Signature 27 | 0.002 | 0.001 | 0.002 | 0.005 | 0.000 | -                     | I                   | 1  | renal clear cell carcinoma                                                                              |                         |
| Signature 28 | 0.000 | 0.000 | 0.000 | 0.000 | 0.017 | -                     | -                   | 1  | stomach cancer                                                                                          |                         |
| Signature 29 | 0.000 | 0.000 | 0.000 | 0.000 | 0.000 | Tobacco chewing       | -                   | 1  | oral squamous cell carcinoma                                                                            |                         |
| Signature 30 | 0.035 | 0.011 | 0.104 | 0.082 | 0.024 | -                     | -                   | 1  | breast cancer                                                                                           |                         |

B.

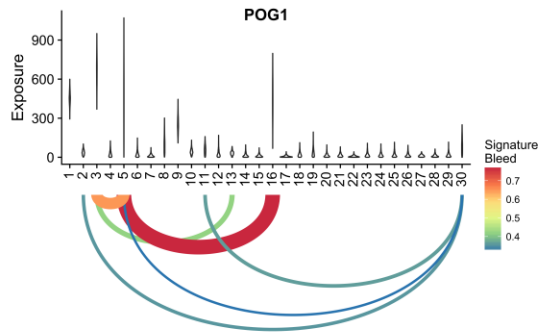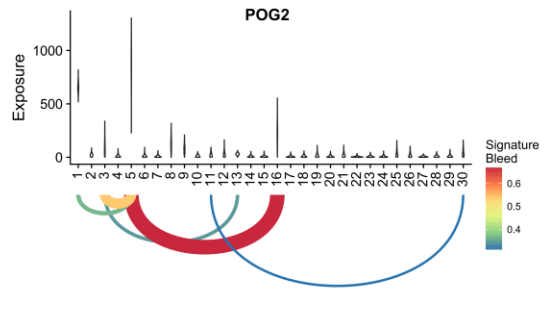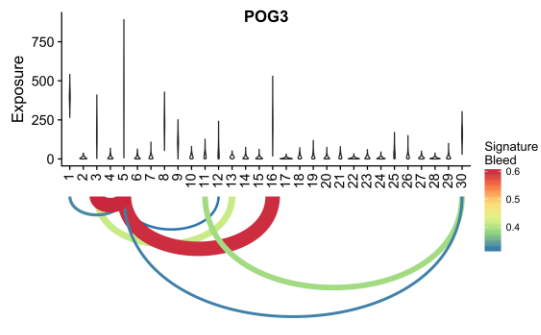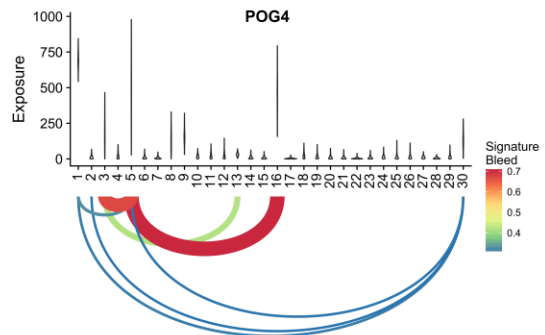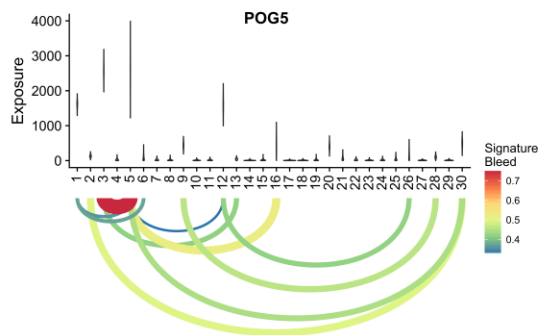

Supplement: supp_mcs.a002626_Supplemental_Figure_1.pdf [file supp_mcs.a002626_Supplemental_Figure_1.pdf]
