# Supplementary material for: Personalized oncogenomic analysis of metastatic adenoid cystic carcinoma: using whole-genome sequencing to inform clinical decision-making
Source: PubMed Central journal article supplement — Cold Spring Harb Mol Case Stud. 2018 Apr;4(2):a002626. doi: 10.1101/mcs.a002626 (PMC5880267; doi:10.1101/mcs.a002626), 2018-04
Supplement: supp_mcs.a002626_Supplemental_Table_1.pdf [file supp_mcs.a002626_Supplemental_Table_1.pdf]

| Gene     | POG 1  | POG 2  | POG 3 | POG 4  | POG 5      |
|----------|--------|--------|-------|--------|------------|
| ABCA13   |        |        |       |        | R4904Q     |
| ABL1     |        |        | G322E |        |            |
| ADAMTS7  |        | R600H  |       |        |            |
| ADGB     |        |        |       | R1519Q |            |
| ANGPTL5  |        | N366K  |       |        |            |
| ANGPTL6  |        | R336Q  |       |        |            |
| ANKRD11  | 92fs   |        |       |        |            |
| ANKRD13C |        | T134K  |       |        |            |
| ARHGAP35 | E98*   |        |       |        |            |
| ARID2    |        |        |       |        | Q997*      |
| ATAD2    |        |        |       | T734I  |            |
| AVL9     |        |        |       | P336L  |            |
| BAP1     |        |        |       | S63C   | E125A      |
| BCAM     | M1V    |        |       |        |            |
| BCL11B   |        |        | G501S |        |            |
| BCOR     | 133fs  | E1303* |       |        | GTWDFY1562 |
| BRPF3    |        |        |       | R563W  |            |
| C15orf39 |        |        | E792Q |        |            |
| C15orf41 | 145fs  |        |       |        |            |
| C2CD3    | S1515L |        |       |        |            |
| C3       | P518S  |        |       |        |            |
| CACNA1B  |        |        |       |        | N66H       |
| CAPN9    |        |        | S228Y |        |            |
| CARS     |        |        |       |        | E486K      |
| CDKN2D   |        | P67L   |       |        |            |
| CEP164   |        | R105P  |       |        |            |
| CHRND    |        |        |       |        | L319M      |
| CLHC1    | 131fs  |        |       |        |            |
| CLTA     |        |        |       | D203E  |            |
| CNR1     |        | G296S  |       |        |            |
| COL15A1  |        |        |       | S1328I |            |
| COL4A5   |        | G1107R |       |        |            |
| CPA4     |        | E151K  |       |        |            |
| CSNK1G1  |        |        |       |        | Q103H      |
| DSC3     | R203H  |        |       |        |            |
| EIF4G2   |        | S454L  |       |        |            |
| FAM198B  |        |        |       |        | P140T      |
| FBXL18   |        |        |       |        | V187L      |
| FGFR2    |        |        |       | C382R  |            |
| GCSAML   |        |        |       |        | T108R      |
| GMEB1    |        | I512T  |       |        |            |
| GRAP2    | 102fs  |        |       |        |            |
| GRK7     |        |        |       |        | A338T      |
| HIRIP3   | L135I  |        |       |        |            |
| IGFBP7   | H200R  |        |       |        |            |

|                 |               |           |
|-----------------|---------------|-----------|
| <b>IKBIP</b>    |               | GKR21     |
| <b>JAK3</b>     |               | G589S     |
| <b>JUND</b>     | Q337H         |           |
| <b>JUP</b>      | E333Q         |           |
| <b>KAT8</b>     |               | C316R     |
| <b>KCNA1</b>    |               | S354L     |
| <b>KDM5B</b>    |               | L1252F    |
| <b>KIAA0430</b> |               | N522S     |
| <b>KIAA1143</b> | V33I          |           |
| <b>KIF1B</b>    |               | N131S     |
| <b>KRAS</b>     |               | G12R      |
| <b>LILRA6</b>   |               | R450L     |
| <b>LSG1</b>     |               | KQ366     |
| <b>LYST</b>     | S3459R        |           |
| <b>LYZL1</b>    |               | T109M     |
| <b>MBD1</b>     | 386fs         |           |
| <b>MECOM</b>    | Q546*         |           |
| <b>MGA</b>      |               | R866*     |
| <b>MT-CO1</b>   | G272A         |           |
| <b>MUC4</b>     |               | A1830T    |
| <b>NOP14</b>    |               | A463ESRfs |
| <b>NOTCH1</b>   | C942Y;ART1349 |           |
| <b>OR13F1</b>   |               | A223T     |
| <b>PAQR4</b>    | R107S         |           |
| <b>PLAGL2</b>   |               | R207L     |
| <b>POLH</b>     | R633C         |           |
| <b>PPP2R5E</b>  |               | S147W     |
| <b>PTDSS2</b>   |               | V323M     |
| <b>RAP2B</b>    |               | P141S     |
| <b>RFC4</b>     |               | R175*     |
| <b>RGS19</b>    | A58T          |           |
| <b>RNF145</b>   | K23fs         |           |
| <b>RRP7A</b>    |               | FY241Y    |
| <b>SAMD9L</b>   |               | N882D     |
| <b>SEC62</b>    | K141fs        |           |
| <b>SEMA6B</b>   |               | R525H     |
| <b>SLC25A37</b> |               | Q204*     |
| <b>SLC2A7</b>   | K71R          |           |
| <b>SLC9A2</b>   |               | R666Q     |
| <b>SLK</b>      |               | A555T     |
| <b>SMARCA2</b>  |               | R1213P    |
| <b>SMARCB1</b>  |               | R37P      |
| <b>SPOCK3</b>   | G31E          |           |
| <b>SSC5D</b>    | P1222S        |           |
| <b>STAT3</b>    |               | N489K     |
| <b>TBC1D15</b>  | I11F          |           |

---

|                 |                 |        |
|-----------------|-----------------|--------|
| <b>TET2</b>     | D143N           |        |
| <b>TICRR</b>    |                 | S838R  |
| <b>TINF2</b>    |                 | D419   |
| <b>TLX1</b>     | K203Q           |        |
| <b>TMEM132D</b> |                 | D136N  |
| <b>TMEM147</b>  |                 | E78G   |
| <b>TMEM39B</b>  |                 | W246L  |
| <b>UTRN</b>     |                 | L2119V |
| <b>VPS45</b>    |                 | S168C  |
| <b>VPS8</b>     | S1399L          |        |
| <b>VSIG10L</b>  | V366A           |        |
| <b>WDSUB1</b>   |                 | T184N  |
| <b>XKR9</b>     | ECRMRYFLME364fs |        |
| <b>YTHDC1</b>   |                 | P125A  |
| <b>ZNF208</b>   |                 | K684E  |
| <b>ZNF236</b>   |                 | N1300K |
| <b>ZNF292</b>   |                 | R89*   |
| <b>ZNF385A</b>  |                 | L200Q  |
| <b>ZNF57</b>    |                 | K248*  |
| <b>ZNF598</b>   |                 | P559L  |
| <b>ZNFX1</b>    |                 | N659fs |

---
