# Supplementary figures and images for: Personalized oncogenomic analysis of metastatic adenoid cystic carcinoma: using whole-genome sequencing to inform clinical decision-making
Source: PubMed Central journal article supplement — Cold Spring Harb Mol Case Stud. 2018 Apr;4(2):a002626. doi: 10.1101/mcs.a002626 (PMC5880267; doi:10.1101/mcs.a002626), 2018-04

POG 1

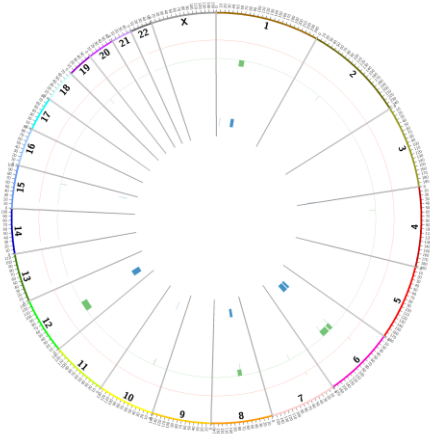

POG 2

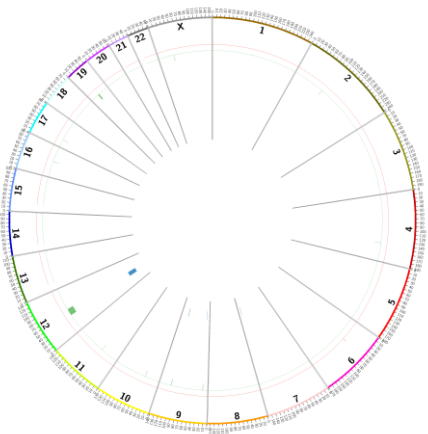

POG 3

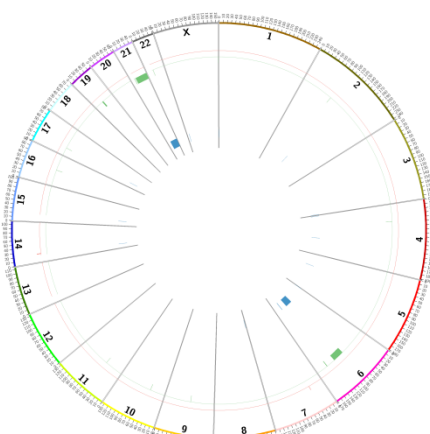

POG 4

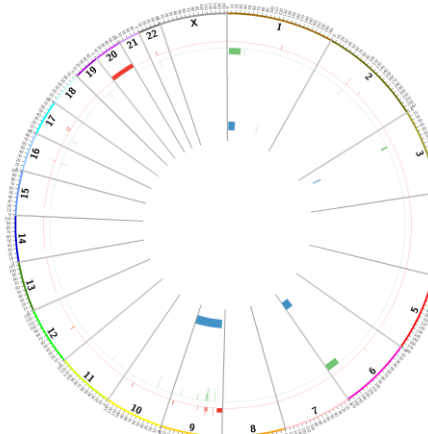

POG 5

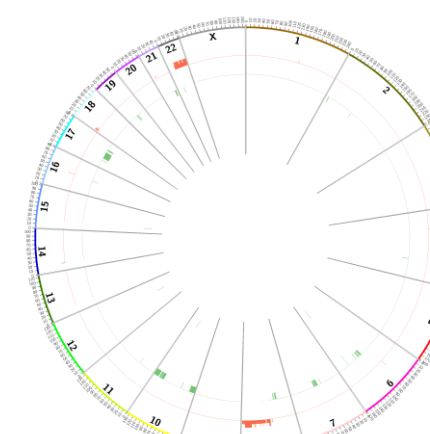

Supplement: supp_mcs.a002626_Supplemental_Figure_2.pdf [file supp_mcs.a002626_Supplemental_Figure_2.pdf]

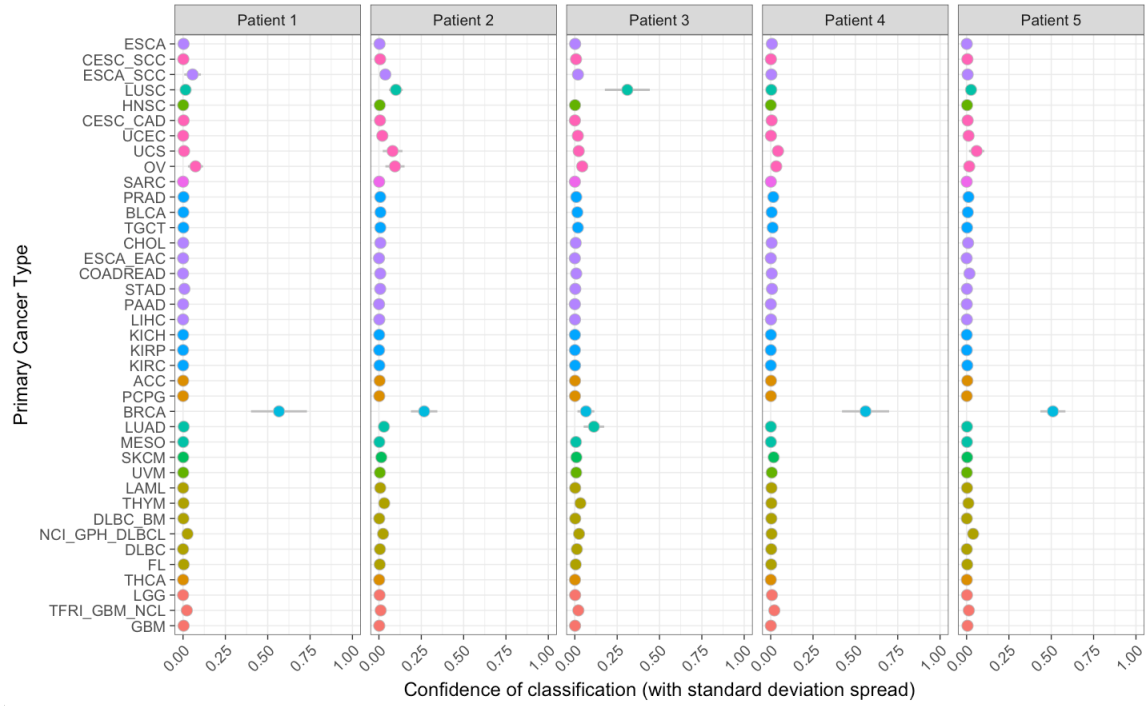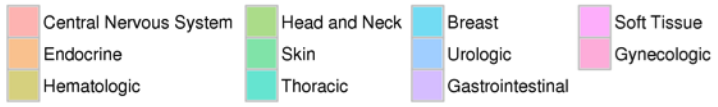

Supplement: supp_mcs.a002626_Supplemental_Figure_3.pdf [file supp_mcs.a002626_Supplemental_Figure_3.pdf]
